# Supplementary material for: Double-strand DNA cleavage by copper complexes of 2,2′-dipyridyl with electropositive pendants
Source: Royal Society of Chemistry journal article supplement (doi:10.1039/b516132k), 2006-01-01
Supplement: b516132k.pdf [file b516132k.pdf]

## Double-strand DNA cleavage by copper complexes of 2,2'-dipyridyl with electropositive pendants

Yan An, Ming-Liang Tong, Liang-Nian Ji and Zong-Wan Mao\*

*School of Chemistry and Chemical Engineering, Sun Yat-Sen University, Guangzhou 510275, China. Fax: (+86) 20 84112245; E-mail: cesmzw@zsu.edu.cn*

**Supporting information available:** The  $^1\text{H-NMR}$  and MS spectra of the ligands, the cif files of **1** and **2**, the  $T_m$  curves of DNA, the agarose gel electrophoresis and corresponding time course of DNA cleavage by the complexes.

- Fig. 1S**  $^1\text{H-NMR}$  spectra of **L**<sup>1</sup> (a) and **L**<sup>2</sup> (b).
- Fig. 2S** ESI-MS spectra of **L**<sup>1</sup> (a) and **L**<sup>2</sup> (b)
- Fig. 3S**  $T_m$  curves of 100  $\mu\text{M}$  CT DNA in 20 mM pH 8.0 HEPES buffer, 0.1 M  $\text{NaClO}_4$ , containing no Cu complex(■), 10  $\mu\text{M}$  of **1**(▼), 20  $\mu\text{M}$  of **1**(▲), 10  $\mu\text{M}$  of **2**(◄) and 20  $\mu\text{M}$  of **2**(►).
- Fig. 4S** Agarose gel showing cleavage of 38  $\mu\text{M}$  pBR322 DNA incubated with 150  $\mu\text{M}$  of complex in 20 mM HEPES, pH 7.2 at 37 °C for 1h for **1** and 24h for **2**. Lane C: DNA control, Lane 1: DNA + **1**, Lanes 2-4: DNA + **1** +100U/mL, 500U/mL, 1,000U/mL Catalase, Lane 5: DNA + **2**, Lanes 6-8: DNA + **2** +100U/mL, 500U/mL, 1,000U/mL Catalase.
- Fig. 5S** Agarose gel electrophoresis (a) and corresponding time course plots (b) showing cleavage of pBR322 DNA by complex **1** (30-300  $\mu\text{M}$ ) and **2** (30-210  $\mu\text{M}$ ) in 20 mM pH 7.2 HEPES buffer at 37 °C. In (a), lane C means DNA control, in (b), symbols ■ indicates the experimental data for the SC forms. The lines connecting them are single exponential fits.



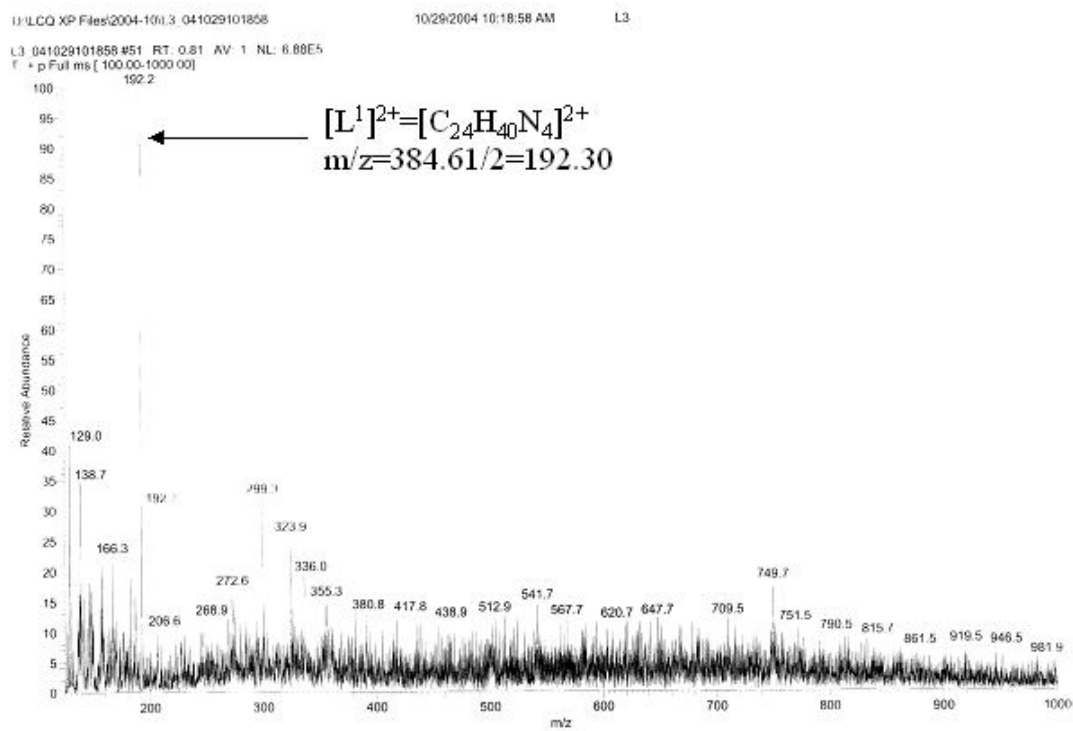

(a)

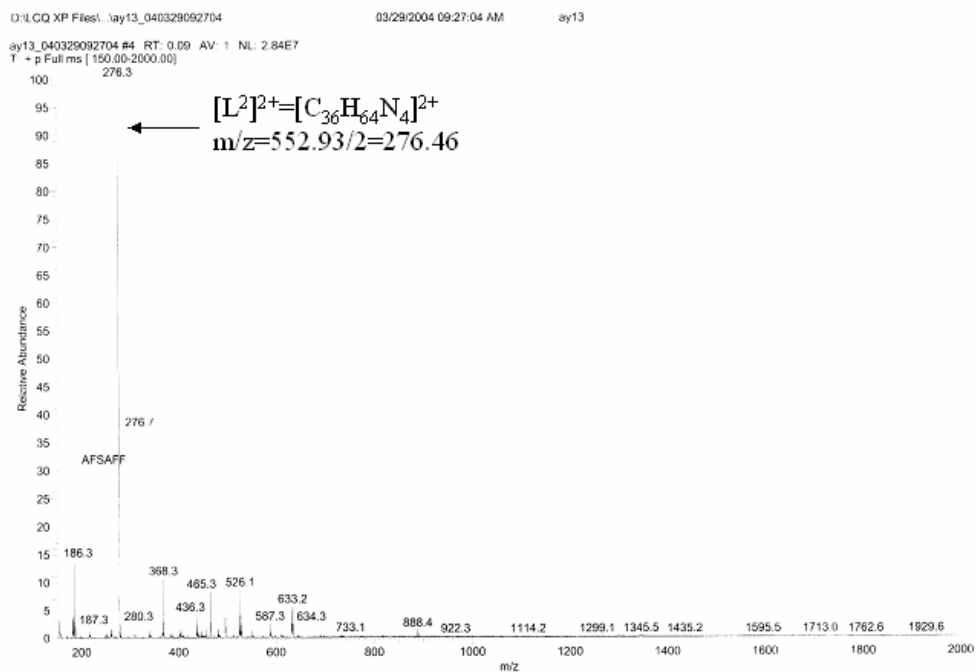

(b)

**Fig. 2S** ESI-MS spectra of  $L^1$  (a) and  $L^2$  (b)

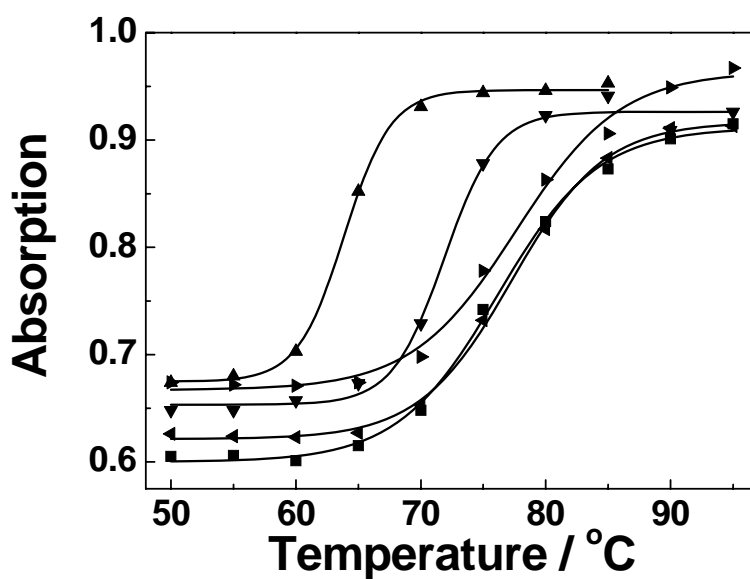

**Fig. 3S**  $T_m$  curves of 100  $\mu\text{M}$  CT DNA in 20 mM pH 8.0 HEPES buffer, 0.1 M  $\text{NaClO}_4$ , containing no Cu complex(■), 10  $\mu\text{M}$  of **1**(▼), 20  $\mu\text{M}$  of **1**(▲), 10  $\mu\text{M}$  of **2**(◄) and 20  $\mu\text{M}$  of **2**(►).

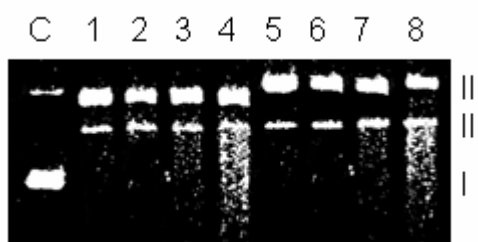

**Fig. 4S** Agarose gel showing cleavage of 38  $\mu\text{M}$  pBR322 DNA incubated with 150  $\mu\text{M}$  of complex in 20 mM HEPES, pH 7.2 at 37  $^\circ\text{C}$  for 1h for **1** and 24h for **2**. Lane C: DNA control, Lane 1: DNA + **1**, Lanes 2-4: DNA + **1** +100U/mL, 500U/mL, 1,000U/mL Catalase, Lane 5: DNA + **2**, Lanes 6-8: DNA + **2** +100U/mL, 500U/mL, 1,000U/mL Catalase.

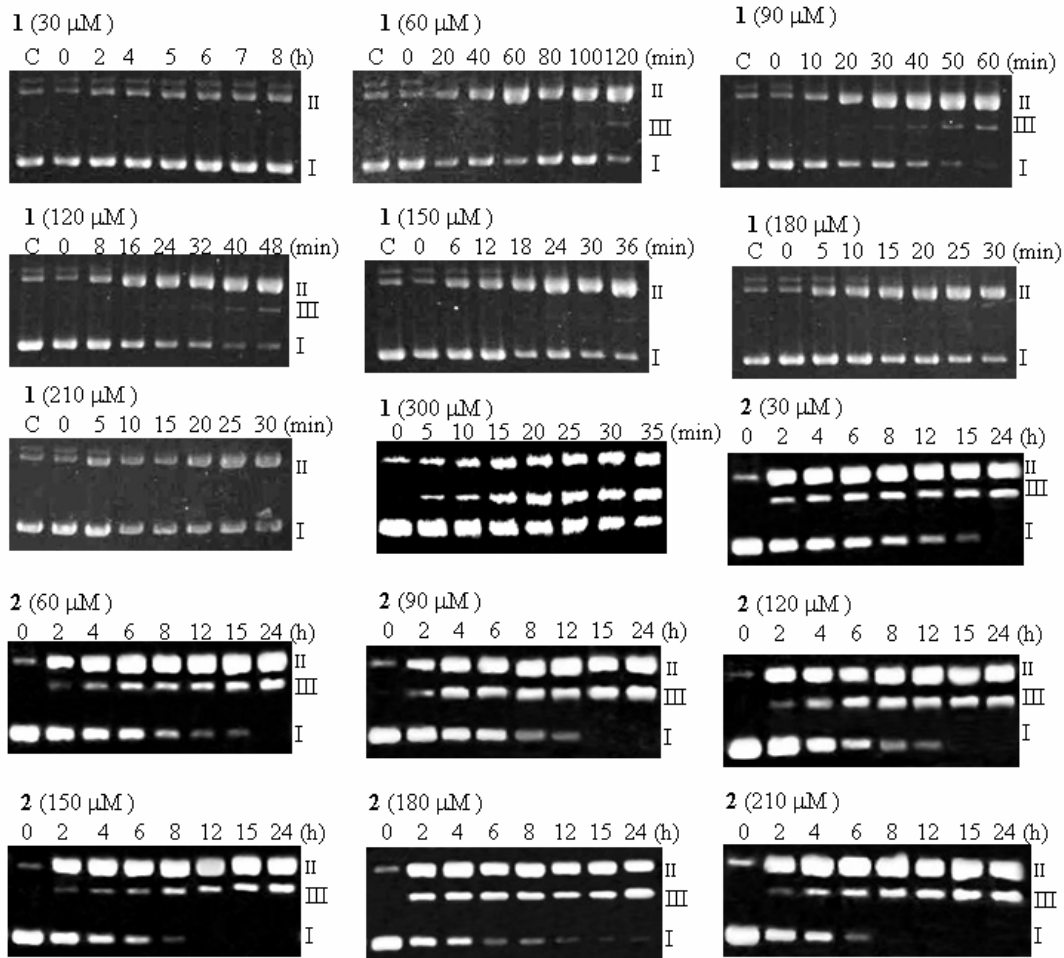

(a)

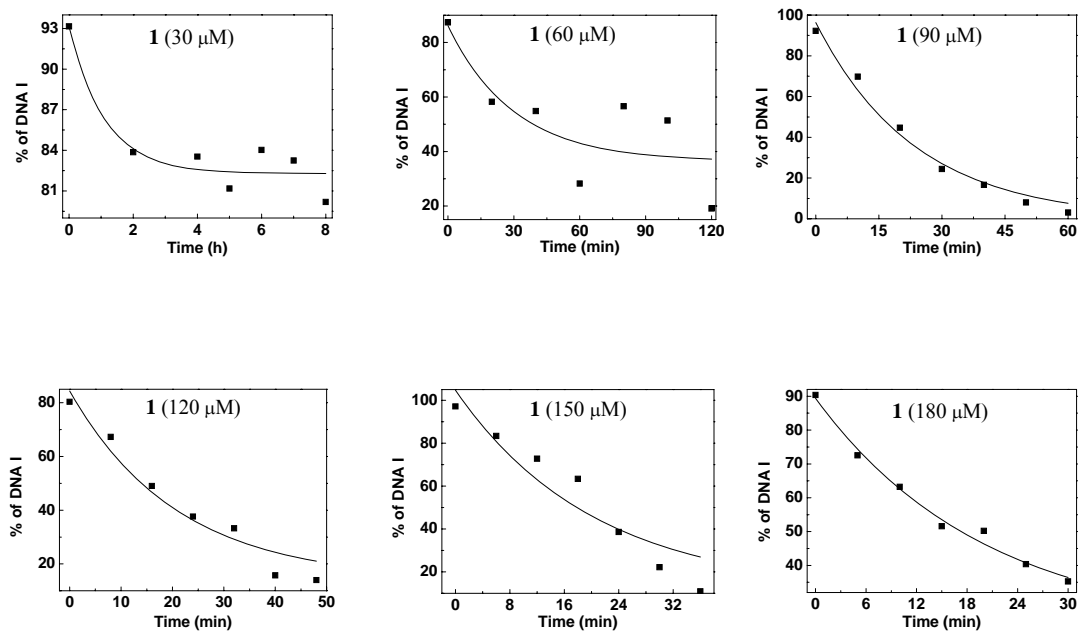

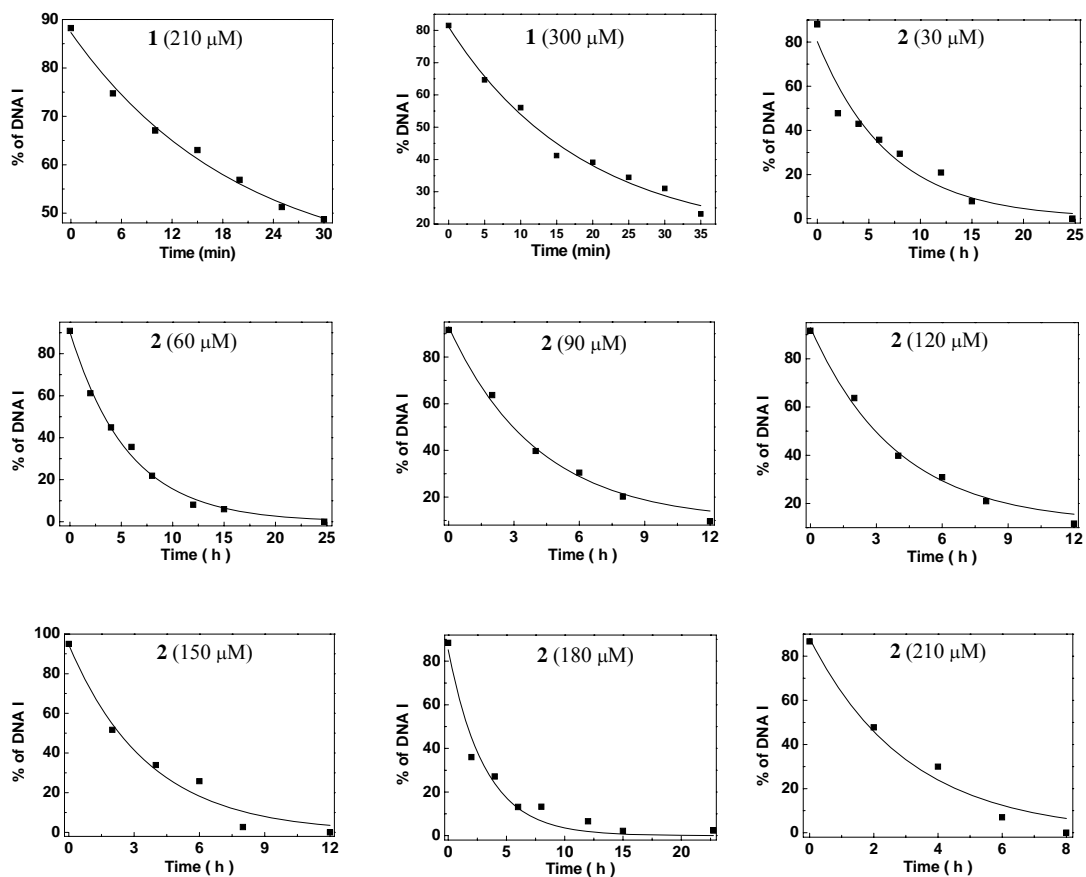

(b)

**Fig. 5S** Agarose gel electrophoresis (a) and corresponding time course plots (b) showing cleavage of pBR322 DNA by complex **1** (30-300  $\mu\text{M}$ ) and **2** (30-210  $\mu\text{M}$ ) in 20 mM pH 7.2 HEPES buffer at 37 °C. In (a), lane C means DNA control, in (b), symbols ■ indicates the experimental data for the SC forms. The lines connecting them are single exponential fits.
